# Supplementary material
Source: Oxford University Press journal article supplement (http://www.oxfordjournals.org/our_journals/semitj/supplement25toc.pdf)
Supplement: Supplementary file 1 [file supplement25toc.pdf]

## Table of Contents

|                                                                                                                                            |     |
|--------------------------------------------------------------------------------------------------------------------------------------------|-----|
| Acknowledgements                                                                                                                           | v   |
| List of abbreviations                                                                                                                      | vii |
| List of participants                                                                                                                       | ix  |
| <b>Jan Retsö and Janet C.E. Watson</b>                                                                                                     |     |
| Introduction                                                                                                                               | 1   |
| <b>Jan Retsö</b>                                                                                                                           |     |
| Nominal Attribution in Semitic: Typology and Diachrony                                                                                     | 3   |
| <b>Kerstin Eksell</b>                                                                                                                      |     |
| D/L-Particles in Arabic Dialects: A Problem Revisited                                                                                      | 35  |
| <b>Lutz Edzard</b>                                                                                                                         |     |
| Genitive Constructions in Semitic: Comparative and Diachronic Perspectives                                                                 | 51  |
| <b>Werner Arnold</b>                                                                                                                       |     |
| Relative Clauses in Western Neo-Aramaic                                                                                                    | 65  |
| <b>Geoffrey Khan</b>                                                                                                                       |     |
| The Genitive and Relative Clauses in the North-Eastern Neo-Aramaic Dialects                                                                | 69  |
| <b>Renaud Kutzy</b>                                                                                                                        |     |
| Genitive Constructions in Targum Onqelos to Genesis: The Relation between the Aramaic of Targum Onqelos and the Aramaic of Targum Jonathan | 89  |
| <b>Lewis Glinert</b>                                                                                                                       |     |
| Towards a Typology of Genitive Constructions in Israeli Hebrew                                                                             | 113 |
| <b>James Dickins</b>                                                                                                                       |     |
| Clausal Annexes and Related Phenomena in Sudanese Arabic                                                                                   | 135 |
| <b>Abdelkader Fassi Fehri</b>                                                                                                              |     |
| Synthetic Arabic DPs                                                                                                                       | 153 |
| <b>Samia Naïm</b>                                                                                                                          |     |
| Possessive Genitive, Dative Construction and TAM Categories                                                                                | 181 |
| <b>Jamal Ouhalla</b>                                                                                                                       |     |
| Variation in Noun Phrases: Shamaliya Arabic and Spanish Arabic                                                                             | 195 |

**Kjell Magne Yri**

Amharic – the Relative and the Genitive: Are they linked semantically?

217

**Janet C.E. Watson**

Annexion, Attribution and Genitives in Mahriyyōt

229
